# Supplementary material for: A Comparative Study on the Bioavailability and Soil-to-Plant Transfer Factors of Potentially Toxic Element Contamination in Agricultural Soils and Their Impacts: A Case Study of Dense Farmland in the Western Region of Saudi Arabia
Source: MDPI journal article supplement (doi:10.3390/pr11092515), 2023-08-22
Supplement: s1 [file s1]

## Electronic Supplementary Informations

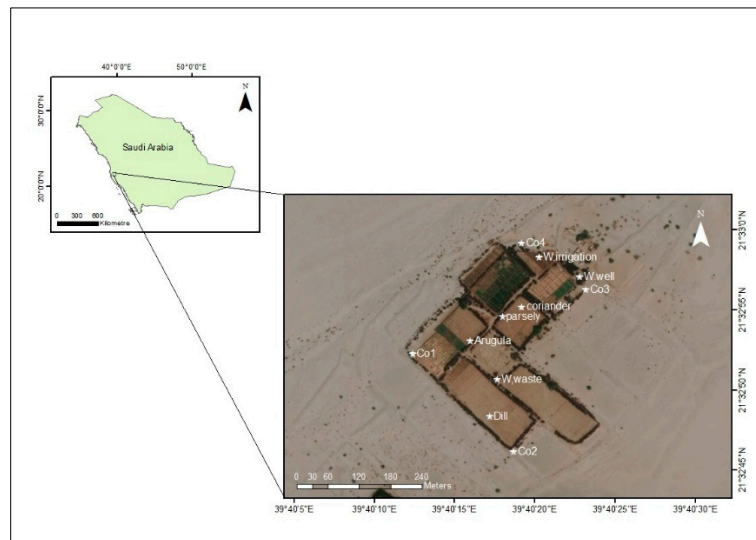

**Figure S1.** A map describing the study area and sampling sites.

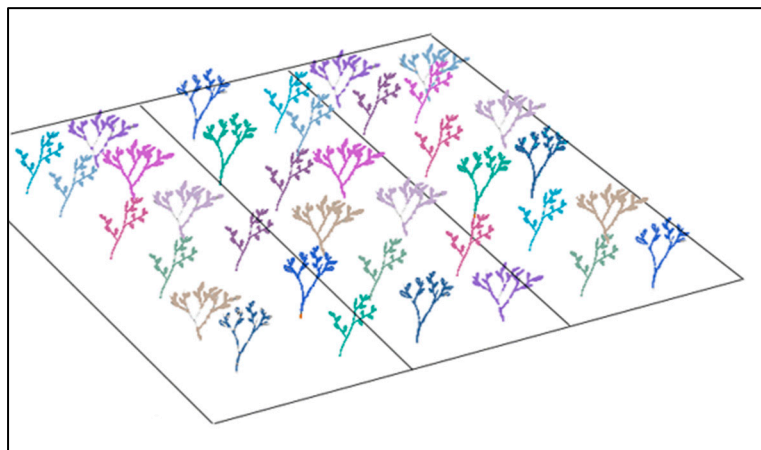

Block 1: Water (red)  
 Water A: well water  
 Water B: wastewater  
 Water C: irrigated water

Block 2: Fertilizers (green)  
 Fertilizer 1: urea  
 Fertilizer 2: NPK

Block 3: Pesticides (blue)  
 Pesticide a: Runner  
 Fertilizer b: NPK

**Figure S2.** An agricultural experiment design for statistical treatment of data.

**Table S1.** Mean element (Pb, Ni, Zn, Fe, Cu and Cr) concentrations based on the combined data of soil and plant

| <i>Source</i>      | <i>Df</i> | <i>Pb</i> |        | <i>Ni</i> |       | <i>Zn</i> |        | <i>Fe</i> |        | <i>Cr</i> |       | <i>Cu</i> |        |
|--------------------|-----------|-----------|--------|-----------|-------|-----------|--------|-----------|--------|-----------|-------|-----------|--------|
|                    |           | F         | Sig    | F         | Sig   | F         | Sig    | F         | Sig    | F         | Sig   | F         | Sig    |
| <i>Block</i>       | 2         | *         | *      | 0.95      | 0.505 | 2.89      | 0.139  | 1.10      | 0.389  | 4.01      | 0.357 | 0.92      | 0.449  |
| <i>Part</i>        | 2         | 4.24      | 0.103  | 1.44      | 0.339 | 28.09     | 0.004* | 40.47     | 0.002* | 2.61      | 0.188 | 3.72      | 0.122  |
| <i>Plant</i>       | 3         | 7.33      | 0.020* | 2.56      | 0.151 | 10.98     | 0.008* | 3.69      | 0.082  | 2.61      | 0.146 | 27.00     | 0.001* |
| <i>Block*Part</i>  | 4         | 0.30      | 0.871  | 0.87      | 0.507 | 0.55      | 0.703  | 1.67      | 0.220  | 0.38      | 0.818 | 1.12      | 0.393  |
| <i>Block*Plant</i> | 6         | 0.37      | 0.882  | 1.18      | 0.379 | 10.85     | 0.000* | 4.67      | 0.011* | 1.18      | 0.378 | 9.77      | 0.000* |
| <i>Plant part*</i> | 6         | 1.76      | 0.191  | 0.88      | 0.535 | 7.97      | 0.001* | 28.51     | 0.000* | 2.46      | 0.087 | 3.64      | 0.027* |

\* Correlation is significant at 95% (0.05) probability.
